# Supplementary material for: Experimental and DFT study on the indium-mediated synthesis of benzophenones via arylstannanes
Source: Royal Society of Chemistry journal article supplement (doi:10.1039/c4ra07305c), 2014-01-01

# Experimental and DFT study on the indium-mediated synthesis of benzophenones via arylstannanes

Marcos Lo Fiego; Mercedes Badajoz; Viviana Dorn;\* María T. Lockhart\* and Alicia Chopa

*INQUISUR, Depto. de Química, Universidad Nacional del Sur, Av. Alem 1253, 8000 Bahía Blanca, Argentina.*

## Table of Contents

### Computational Section

|                                                                                                                               |              |
|-------------------------------------------------------------------------------------------------------------------------------|--------------|
| AEAs for benzoyl chlorides in gas phase and condensed phase [B3LYP/6-31+G* - SCRF(PCM)]                                       | <i>SI-2</i>  |
| Graph of AEAs with respect to $1/\epsilon$ for <b>1d</b> and <b>1g</b> [B3LYP/6-31+G* - SCRF(PCM)]                            | <i>SI-3</i>  |
| Graph of reaction pathways (elongation of Cl-C(O) bond) for <b>1g</b> <sup>-</sup> and <b>1d</b> <sup>-</sup> (B3LYP/6-31+G*) | <i>SI-4</i>  |
| PES for Cl-C(O) bond fragmentation of <b>1d</b> <sup>-</sup> (B3LYP/6-31+G*)                                                  | <i>SI-5</i>  |
| Ea for Cl-C(O) bond fragmentation of <b>1d</b> <sup>-</sup> (B3LYP/6-31+G* - SCRF(PCM))                                       | <i>SI-5</i>  |
| Cartesians coordinates and Energy of the Radical Anion <b>1d</b> <sup>-</sup> (B3LYP/6-31+G*)                                 | <i>SI-6</i>  |
| Cartesians coordinates and Energy of the corresponding <b>TS</b> (B3LYP/6-31+G*)                                              | <i>SI-6</i>  |
| Cartesians coordinates and Energy of the corresponding <b>Radical</b> (B3LYP/6-31+G*)                                         | <i>SI-7</i>  |
| Cartesians coordinates and Energy of the neutral <b>1d</b> (B3LYP/6-31+G*)                                                    | <i>SI-7</i>  |
| Cartesians coordinates and Energy of the neutral <b>1c</b> (B3LYP/6-31+G*)                                                    | <i>SI-8</i>  |
| Cartesians coordinates and Energy of the Radical Anion <b>1c</b> <sup>-</sup> (B3LYP/6-31+G*)                                 | <i>SI-8</i>  |
| Cartesians coordinates and Energy of the neutral <b>1a</b> (B3LYP/6-31+G*)                                                    | <i>SI-9</i>  |
| Cartesians coordinates and Energy of the neutral <b>1a</b> <sup>-</sup> (B3LYP/6-31+G*)                                       | <i>SI-9</i>  |
| Cartesians coordinates and Energy of the neutral <b>1g</b> (B3LYP/6-31+G*)                                                    | <i>SI-9</i>  |
| Cartesians coordinates and Energy of the Radical Anion <b>1g</b> <sup>-</sup> (B3LYP/6-31+G*)                                 | <i>SI-10</i> |
| Cartesians coordinates and Energy of the neutral <b>1e</b> (B3LYP/6-31+G*)                                                    | <i>SI-11</i> |
| Cartesians coordinates and Energy of the Radical Anion <b>1e</b> <sup>-</sup> (B3LYP/6-31+G*)                                 | <i>SI-11</i> |
| Cartesians coordinates and Energy of the neutral <b>1b</b> (B3LYP/6-31+G*)                                                    | <i>Si-12</i> |
| Cartesians coordinates and Energy of the Radical Anion <b>1b</b> <sup>-</sup> (B3LYP/6-31+G*)                                 | <i>SI-12</i> |
| Cartesians coordinates and Energy of the neutral <b>1f</b> (B3LYP/6-31+G*)                                                    | <i>SI-13</i> |
| Cartesians coordinates and Energy of the Radical Anion <b>1f</b> <sup>-</sup> (B3LYP/6-31+G*)                                 | <i>SI-13</i> |
| Cartesians coordinates and Energy of the Radical Anion <b>1d</b> <sup>-</sup> (B3LYP/6-31+G**)                                | <i>SI-14</i> |
| Cartesians coordinates and Energy of the corresponding <b>TS</b> (B3LYP/6-31+G**)                                             | <i>SI-14</i> |
| Cartesians coordinates and Energy of the neutral <b>1c</b> (B3LYP/6-31+G**)                                                   | <i>SI-15</i> |

|                                                                                                                                                                                                                                              |                     |
|----------------------------------------------------------------------------------------------------------------------------------------------------------------------------------------------------------------------------------------------|---------------------|
| Cartesians coordinates and Energy of the Radical Anion <b>1c<sup>-</sup></b> (B3LYP/6-31+G**)                                                                                                                                                | <b><i>SI-15</i></b> |
| Cartesians coordinates and Energy of the Radical Anion <b>1g<sup>-</sup></b> (B3LYP/6-31+G**)                                                                                                                                                | <b><i>SI-16</i></b> |
| Cartesians coordinates and Energy of the Radical Anion <b>1d<sup>-</sup></b> (B3LYP/6-31++G**)                                                                                                                                               | <b><i>SI-16</i></b> |
| Cartesians coordinates and Energy of the corresponding <b>TS</b> (B3LYP/6-31++G**)                                                                                                                                                           | <b><i>SI-17</i></b> |
| Cartesians coordinates and Energy of the neutral <b>1c</b> (B3LYP/6-31++G**)                                                                                                                                                                 | <b><i>SI-17</i></b> |
| Cartesians coordinates and Energy of the Radical Anion <b>1c<sup>-</sup></b> (B3LYP/6-31++G**)                                                                                                                                               | <b><i>SI-17</i></b> |
| Cartesians coordinates and Energy of the Radical Anion <b>1g<sup>-</sup></b> (B3LYP/6-31++G**)                                                                                                                                               | <b><i>SI-18</i></b> |
| Spin density distribution and value on C(O)-Cl of the Radical Anions <b>1c<sup>-</sup></b> , <b>1d<sup>-</sup></b> , <b>1g<sup>-</sup></b> , <b>1a<sup>-</sup></b> , <b>1b<sup>-</sup></b> , <b>1e<sup>-</sup></b> and <b>1f<sup>-</sup></b> | <b><i>SI-19</i></b> |
| Geometry of the Radical Anion <b>1g<sup>-</sup></b>                                                                                                                                                                                          | <b><i>SI-20</i></b> |

## **Spectra Section**

|                                                                                                                                  |                     |
|----------------------------------------------------------------------------------------------------------------------------------|---------------------|
| Copy of <sup>1</sup> H and <sup>13</sup> C NMR spectra of (3,5-dimethoxyphenyl)(2,6-dimethylphenyl)methanone ( <b>3dd</b> )      | <b><i>SI-21</i></b> |
| Copy of <sup>1</sup> H and <sup>13</sup> C NMR spectra of (3,4-dimethoxyphenyl)(2,6-dimethylphenyl)methanone ( <b>3ed</b> )      | <b><i>SI-22</i></b> |
| Copy of <sup>1</sup> H and <sup>13</sup> C NMR spectrums of (3,4,5-Trimethoxyphenyl)(2,6-dimethylphenyl)methanone ( <b>3fd</b> ) | <b><i>SI-23</i></b> |

**Adiabatic electron affinities energy (B3LYP/6-31+G\*) for benzoyl chlorides**

| Benzoyl chlorides                                                                                    | Adiabatic EAs energy (eV) |                                                                            |
|------------------------------------------------------------------------------------------------------|---------------------------|----------------------------------------------------------------------------|
|                                                                                                      | Gas Phase                 | Condensed Phase [SCRF(PCM)]                                                |
| 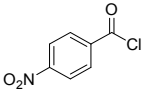<br><b>1c</b>       | 2.37                      |                                                                            |
| <br><b>1a</b>       | 0.98                      |                                                                            |
| <br><b>1d (3,5)</b> | 0.89                      | 2.47 ( $\epsilon=4.7$ ); 2.72 ( $\epsilon=9.9$ ); 2.84 ( $\epsilon=20.7$ ) |
| <br><b>1g (2,6)</b> | 0.58                      | 2.03 ( $\epsilon=4.7$ ); 2.26 ( $\epsilon=9.9$ ); 2.39 ( $\epsilon=20.7$ ) |
| <br><b>1e (3,4)</b> | 0.80                      |                                                                            |
| <br><b>1b</b>       | 0.88                      |                                                                            |
| <br><b>1f</b>     | 0.94                      |                                                                            |

### Adiabatic electron affinities vs $1/\epsilon$ for 1d and 1g [Condensed Phase, SCRF(PCM)]

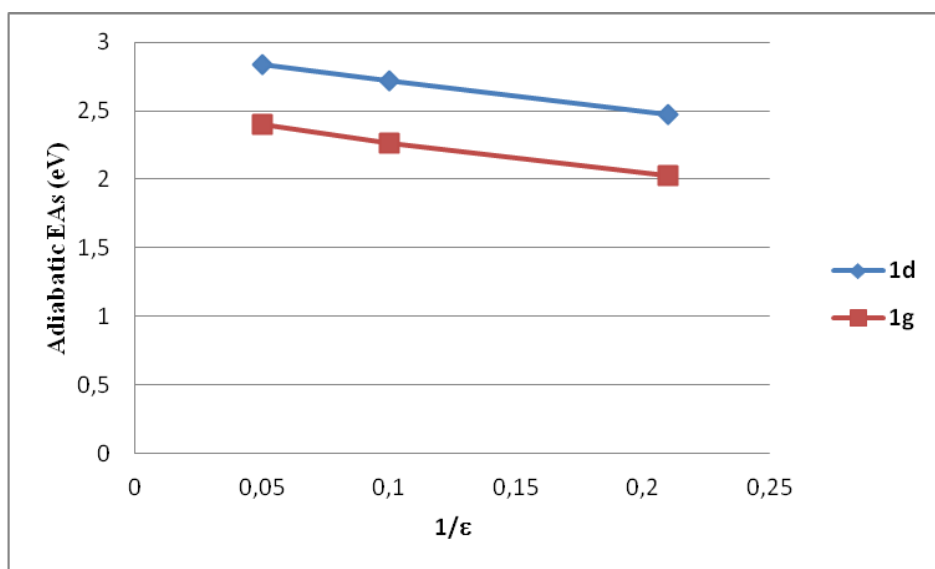

| $1/\epsilon$ | AEAs |      |
|--------------|------|------|
|              | 1d   | 1g   |
| 0,21         | 2,47 | 2,03 |
| 0,10         | 2,72 | 2,26 |
| 0,05         | 2,84 | 2,39 |

$\epsilon=4.7$ ;  $\epsilon=9.9$ ;  $\epsilon=20.7$

### Adiabatic electron affinities vs $1/\epsilon$ for 1d and 1g [Condensed Phase, SCRF(PCM) and Gas Phase]

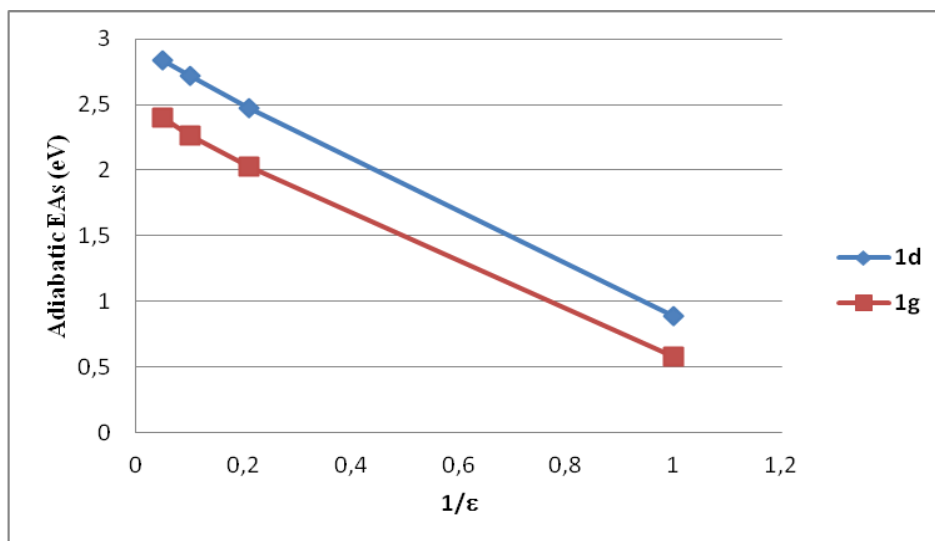

| $1/\epsilon$ | AEAs |      |
|--------------|------|------|
|              | 1d   | 1g   |
| 1            | 0,89 | 0,58 |
| 0,21         | 2,47 | 2,03 |
| 0,10         | 2,72 | 2,26 |
| 0,05         | 2,84 | 2,39 |

$\epsilon=1$ ;  $\epsilon=4.7$ ;  $\epsilon=9.9$ ;  $\epsilon=20.7$

Graph of elongation of C(O)-Cl bond for 1g<sup>-</sup> (B3LYP/6-31+G\*)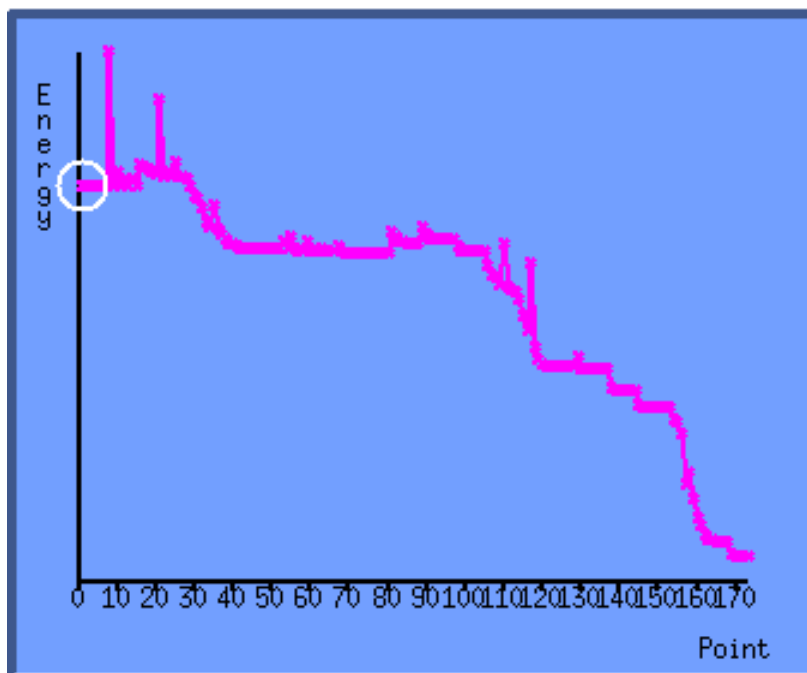

| C(O)-Cl distance (Å) | Energy (Hartree) |
|----------------------|------------------|
| 2.00                 | -1034.251800     |
| 2.10                 | -1034.254660     |
| 2.20                 | -1034.254233     |
| 2.30                 | -1034.254036     |
| 2.40                 | -1034.254548     |
| 2.50                 | -1034.259592     |
| 2.60                 | -1034.260489     |
| 2.70                 | -1034.261197     |
| 2.80                 | -1034.266826     |
| 2.90                 | -1034.267465     |

Graph of elongation of C(O)-Cl bond for 1d<sup>-</sup> (B3LYP/6-31+G\*)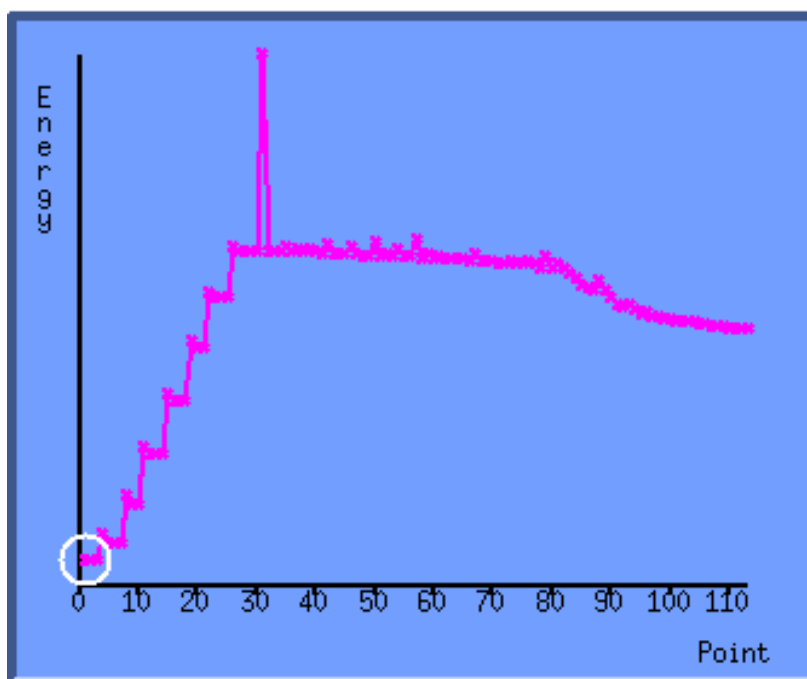

| C(O)-Cl distance (Å) | Energy (Hartree) |
|----------------------|------------------|
| 1.97                 | -1034.280338     |
| 2.07                 | -1034.279640     |
| 2.17                 | -1034.278005     |
| 2.27                 | -1034.275938     |
| 2.37                 | -1034.273717     |
| 2.47                 | -1034.271523     |
| 2.57                 | -1034.269459     |
| 2.67                 | -1034.270718     |
| 2.77                 | -1034.270103     |

PES for Cl-C(O) bond fragmentation of 1d<sup>•</sup> (B3LYP/6-31+G<sup>\*</sup>)

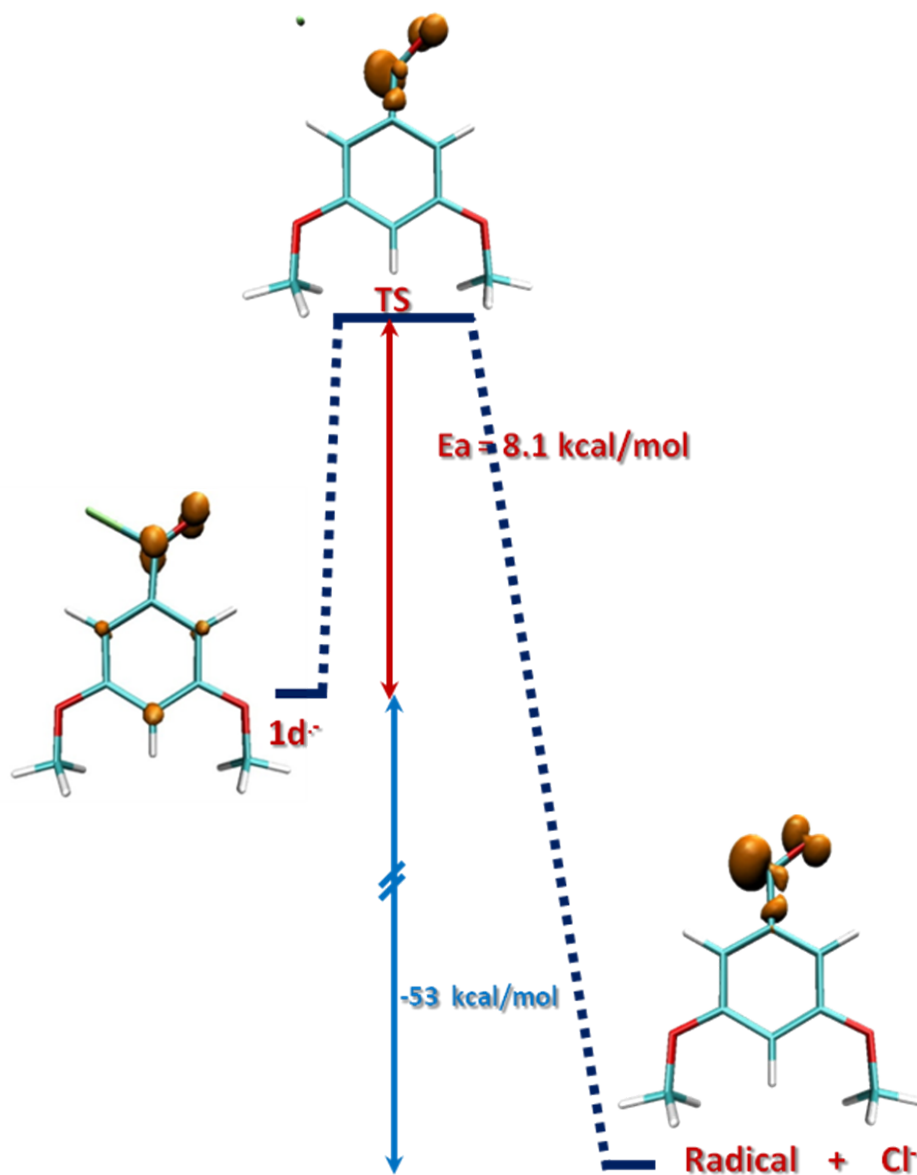

Activation Energy for Cl-C(O) bond fragmentation of 1d<sup>•</sup> [B3LYP/6-31+G<sup>\*</sup>, SCRF(PCM)]

| AE<br>(Kcal/mol) | $\epsilon$ |
|------------------|------------|
| 8.1              | 1          |
| 9.2              | 4.7        |
| 10.8             | 9.9        |
| 11.5             | 20.7       |

**Cartesians coordinates****1d<sup>-</sup>**

22

ZPE: -1034.121015 a.u., thermal energy: -1034.107268 a.u. (B3LYP/6-31+G\* - scaled factor 0.986)

ZPE: -1034.185922 a.u., thermal energy: -1034.196858 a.u. (B3LYP/6-31+G\* - scaled factor 0.986 - SCRF(PCM,solvent=chloroform) -  $\epsilon=4.7$ )

ZPE: -1034.196858 a.u., thermal energy: -1034.183168 a.u. (B3LYP/6-31+G\* - scaled factor 0.986 - SCRF(PCM,solvent=o-dichlorobenzene) -  $\epsilon=9.9$ )

ZPE: -1034.202094 a.u., thermal energy: -1034.188398 a.u. (B3LYP/6-31+G\* - scaled factor 0.986 - SCRF(PCM,solvent=acetone) -  $\epsilon=20.7$ )

-1 2

|    |           |           |           |
|----|-----------|-----------|-----------|
| C  | -0.000272 | -0.000005 | -0.005893 |
| C  | 0.023071  | -0.000033 | 1.408940  |
| C  | 1.198137  | -0.000070 | 2.136197  |
| C  | 2.463670  | -0.000089 | 1.464589  |
| C  | 2.448922  | -0.000058 | 0.024372  |
| C  | 1.252138  | -0.000018 | -0.664050 |
| O  | -1.147497 | -0.000025 | 2.165625  |
| C  | -2.385151 | 0.000007  | 1.493941  |
| C  | 3.736049  | -0.000091 | 2.087247  |
| O  | 4.872630  | 0.000066  | 1.630016  |
| O  | 1.356225  | 0.000002  | -2.053851 |
| C  | 0.173077  | 0.000027  | -2.818440 |
| Cl | 3.651945  | 0.000269  | 4.054551  |
| H  | 3.384534  | -0.000066 | -0.523246 |
| H  | 1.149955  | -0.000088 | 3.217549  |
| H  | 0.489924  | 0.000036  | -3.866010 |
| H  | -0.439844 | -0.894755 | -2.630020 |
| H  | -0.439820 | 0.894821  | -2.629997 |
| H  | -0.929154 | 0.000025  | -0.557245 |
| H  | -3.152724 | 0.000006  | 2.274090  |
| H  | -2.513935 | 0.894826  | 0.865622  |
| H  | -2.513964 | -0.894786 | 0.865591  |

**Cartesians coordinates****TS<sup>-</sup>**

22

ZPE: -1034.107654 a.u., thermal energy: -1034.094315 a.u. (B3LYP/6-31+G\* - scaled factor 0.986)

ZPE: -1034.170955 a.u., thermal energy: -1034.157643 a.u. (B3LYP/6-31+G\* - scaled factor 0.986 - SCRF(PCM,solvent=chloroform) -  $\epsilon=4.7$ )

ZPE: -1034.179222 a.u., thermal energy: -1034.165875 a.u. (B3LYP/6-31+G\* - scaled factor 0.986 - SCRF(PCM,solvent=o-dichlorobenzene) -  $\epsilon=9.9$ )

ZPE: -1034.182099 a.u., thermal energy: -1034.170046 a.u. (B3LYP/6-31+G\* - scaled factor 0.986 - SCRF(PCM,solvent=acetone) -  $\epsilon=20.7$ )

-1 2

|   |           |           |           |
|---|-----------|-----------|-----------|
| C | 0.000000  | 0.000000  | 0.000000  |
| C | 0.000000  | 0.000000  | 1.407214  |
| C | 1.219230  | 0.000000  | 2.078600  |
| C | 2.429685  | -0.019827 | 1.367135  |
| C | 2.395779  | -0.031457 | -0.038282 |
| C | 1.186230  | -0.002644 | -0.739040 |
| O | 1.151919  | 0.013015  | 3.457955  |
| C | 2.357918  | -0.044110 | 4.195646  |
| O | 3.531487  | -0.055300 | -0.807562 |
| C | 4.791676  | -0.098799 | -0.171295 |
| C | -1.305487 | 0.104303  | -0.703286 |

|    |           |           |           |
|----|-----------|-----------|-----------|
| Cl | 0.123062  | -0.474672 | -3.961188 |
| O  | -2.374468 | -0.288471 | -0.334938 |
| H  | -0.929661 | -0.001031 | 1.965457  |
| H  | 1.142640  | -0.025387 | -1.833151 |
| H  | 2.066507  | -0.047921 | 5.248192  |
| H  | 2.926374  | -0.958430 | 3.975745  |
| H  | 2.996113  | 0.829806  | 4.003474  |
| H  | 3.373748  | -0.021586 | 1.893642  |
| H  | 5.530506  | -0.127058 | -0.974576 |
| H  | 4.969084  | 0.792319  | 0.448567  |
| H  | 4.904040  | -0.997557 | 0.452218  |

### Cartesians coordinates

#### Radical

21

ZPE: -573.828112 a.u., thermal energy: -573.816401 a.u. (B3LYP/6-31+G\* - scaled factor 0.986)

0 2

|   |           |           |           |
|---|-----------|-----------|-----------|
| C | -0.014717 | 0.000000  | -0.024579 |
| C | 0.010941  | 0.000000  | 1.382087  |
| C | 1.243375  | 0.000000  | 2.052894  |
| C | 2.442430  | 0.000000  | 1.331942  |
| C | 2.393797  | 0.000000  | -0.064817 |
| C | 1.173850  | 0.000000  | -0.757035 |
| O | 1.367577  | 0.000000  | 3.411997  |
| C | 0.193667  | 0.000000  | 4.214341  |
| C | 3.675041  | 0.000000  | -0.813467 |
| O | -1.166279 | 0.000000  | -0.757530 |
| C | -2.418831 | 0.000000  | -0.084452 |
| O | 3.851857  | 0.000000  | -1.994102 |
| H | 1.145509  | 0.000000  | -1.841190 |
| H | 3.391485  | 0.000000  | 1.857122  |
| H | -3.175351 | 0.000000  | -0.870820 |
| H | -2.539259 | -0.897921 | 0.535838  |
| H | -2.539259 | 0.897921  | 0.535838  |
| H | -0.913850 | 0.000000  | 1.942886  |
| H | 0.543297  | 0.000000  | 5.247981  |
| H | -0.412310 | 0.897859  | 4.034970  |
| H | -0.412310 | -0.897859 | 4.034971  |

### Cartesians coordinates

#### 1d

22

ZPE: -1034.087112 a.u., thermal energy: -1034.074320 a.u. (B3LYP/6-31+G\* - scaled factor 0.986)

ZPE: -1034.094404 a.u., thermal energy: -1034.081519 a.u. (B3LYP/6-31+G\* - scaled factor 0.986 - SCRF(PCM,solvent=chloroform) -  $\epsilon=4.7$ )

ZPE: -1034.096070 a.u., thermal energy: -1034.083155 a.u. (B3LYP/6-31+G\* - scaled factor 0.986 - SCRF(PCM,solvent=o-dichlorobenzene) -  $\epsilon=9.9$ )

ZPE: -1034.096926 a.u., thermal energy: -1034.083994 a.u. (B3LYP/6-31+G\* - scaled factor 0.986 - SCRF(PCM,solvent=acetone) -  $\epsilon=20.7$ )

0 1

|   |          |          |           |
|---|----------|----------|-----------|
| C | 0.001855 | 0.000000 | -0.013573 |
| C | 0.014093 | 0.000000 | 1.391244  |
| C | 1.243740 | 0.000000 | 2.066749  |
| C | 2.449686 | 0.000000 | 1.358233  |
| C | 2.415883 | 0.000000 | -0.039846 |
| C | 1.197528 | 0.000000 | -0.734398 |



|    |           |           |           |
|----|-----------|-----------|-----------|
| O  | 1.360077  | 0.000000  | 3.425168  |
| C  | 0.182481  | 0.000000  | 4.221631  |
| C  | 3.643749  | 0.000000  | -0.882314 |
| Cl | 5.226293  | 0.000000  | 0.024458  |
| O  | -1.139423 | 0.000000  | -0.758982 |
| C  | -2.399072 | 0.000000  | -0.100029 |
| O  | 3.674140  | 0.000000  | -2.077301 |
| H  | 1.175192  | 0.000000  | -1.817642 |
| H  | 3.382157  | 0.000000  | 1.907219  |
| H  | -3.146805 | 0.000000  | -0.894705 |
| H  | -2.526157 | -0.897954 | 0.518951  |
| H  | -2.526157 | 0.897954  | 0.518951  |
| H  | -0.914258 | 0.000000  | 1.946295  |
| H  | 0.527310  | 0.000000  | 5.256857  |
| H  | -0.422595 | 0.897935  | 4.039430  |
| H  | -0.422595 | -0.897935 | 4.039430  |

**Cartesians coordinates****1c**

16

ZPE: -1009.602810 a.u., thermal energy: -1009.592746 a.u. (B3LYP/6-31+G\* - scaled factor 0.986)

0 1

|    |           |           |           |
|----|-----------|-----------|-----------|
| C  | 0.009134  | 0.000012  | -0.132221 |
| C  | -0.053311 | 0.000003  | 1.268897  |
| C  | 1.132456  | 0.000011  | 2.026271  |
| C  | 2.370079  | 0.000029  | 1.391834  |
| C  | 2.403405  | 0.000040  | -0.002972 |
| C  | 1.244649  | 0.000030  | -0.776760 |
| C  | -1.331956 | -0.000017 | 2.037379  |
| O  | -1.417479 | -0.000031 | 3.229867  |
| N  | 3.716999  | 0.000062  | -0.685030 |
| O  | 4.724041  | -0.000093 | 0.021456  |
| O  | 3.719307  | -0.000091 | -1.915184 |
| H  | 1.070393  | 0.000003  | 3.109076  |
| H  | 3.295253  | 0.000035  | 1.955518  |
| H  | 1.316024  | 0.000038  | -1.857703 |
| H  | -0.901301 | 0.000006  | -0.719179 |
| Cl | -2.848073 | -0.000037 | 1.044703  |

**Cartesians coordinates****1c'**

16

ZPE: -1009.690394 a.u., thermal energy: -1009.680191 a.u. (B3LYP/6-31+G\* - scaled factor 0.986)

-1 2

|   |           |           |           |
|---|-----------|-----------|-----------|
| C | 0.014938  | 0.000034  | -0.132007 |
| C | -0.073572 | 0.000040  | 1.290374  |
| C | 1.151836  | 0.000030  | 2.030743  |
| C | 2.373976  | 0.000020  | 1.397298  |
| C | 2.440136  | 0.000017  | -0.021352 |
| C | 1.235758  | 0.000025  | -0.772583 |
| C | -1.290310 | 0.000054  | 2.048795  |
| O | -1.463389 | -0.000069 | 3.245884  |
| N | 3.683870  | 0.000006  | -0.672565 |
| O | 4.742992  | -0.000079 | 0.026592  |

|    |           |           |           |
|----|-----------|-----------|-----------|
| O  | 3.713032  | -0.000070 | -1.941023 |
| H  | 1.100179  | 0.000033  | 3.115235  |
| H  | 3.299909  | 0.000014  | 1.960179  |
| H  | 1.300032  | 0.000024  | -1.854120 |
| H  | -0.896522 | 0.000040  | -0.718584 |
| Cl | -2.883246 | -0.000120 | 0.993087  |

**Cartesians coordinates****1a**

14

ZPE: -805.099795 a.u., thermal energy: -805.092340 a.u. (B3LYP/6-31+G\* - scaled factor 0.986)

0 1

|    |           |           |           |
|----|-----------|-----------|-----------|
| C  | 0.004891  | 0.000001  | -0.005191 |
| C  | 0.007667  | 0.000002  | 1.398162  |
| C  | 1.231314  | 0.000001  | 2.094522  |
| C  | 2.433287  | 0.000000  | 1.391733  |
| C  | 2.426175  | -0.000001 | -0.007771 |
| C  | 1.213164  | 0.000000  | -0.702319 |
| C  | -1.224159 | 0.000003  | 2.225921  |
| Cl | -2.798737 | -0.000005 | 1.299846  |
| O  | -1.268688 | -0.000002 | 3.421181  |
| H  | 1.221258  | 0.000001  | 3.179570  |
| H  | 3.375230  | -0.000001 | 1.933304  |
| H  | 3.365091  | -0.000002 | -0.555448 |
| H  | 1.206161  | 0.000000  | -1.788726 |
| H  | -0.934264 | 0.000002  | -0.545910 |

**Cartesians coordinates****1a'**

14

ZPE: -805.136543 a.u., thermal energy: -805.128530 a.u. (B3LYP/6-31+G\* - scaled factor 0.986)

-1 2

|    |             |             |             |
|----|-------------|-------------|-------------|
| C  | 0.00627500  | -0.00000700 | -0.00510000 |
| C  | -0.02241900 | -0.00000800 | 1.43115900  |
| C  | 1.25716200  | -0.00000200 | 2.10235300  |
| C  | 2.44250700  | 0.00000300  | 1.38746300  |
| C  | 2.45162200  | 0.00000300  | -0.02524100 |
| C  | 1.20701900  | -0.00000200 | -0.69567000 |
| C  | -1.17505000 | -0.00001000 | 2.24967600  |
| Cl | -2.87290700 | 0.00002200  | 1.22220800  |
| O  | -1.32857100 | 0.00000300  | 3.46338700  |
| H  | 1.26670400  | -0.00000200 | 3.18847200  |
| H  | 3.38720400  | 0.00000600  | 1.93252500  |
| H  | 3.38730300  | 0.00000600  | -0.58002700 |
| H  | 1.18442400  | -0.00000200 | -1.78583300 |
| H  | -0.93288200 | -0.00001000 | -0.54649800 |

**Cartesians coordinates****1g**

22

ZPE: -1034.078108 a.u., thermal energy: -1034.065056 a.u. (B3LYP/6-31+G\* - scaled factor 0.986)

ZPE: -1034.086146 a.u., thermal energy: -1034.073113 a.u. (B3LYP/6-31+G\* - scaled factor 0.986 - SCRF(PCM,solvent=chloroform) -  $\epsilon=4.7$ )

ZPE: -1034.088004 a.u., thermal energy: -1034.074976 a.u. (B3LYP/6-31+G\* - scaled factor 0.986 - SCRF(PCM,solvent=o-dichlorobenzene) -  $\epsilon=9.9$ )

ZPE: -1034.088952 a.u., thermal energy: -1034.075931 a.u. (B3LYP/6-31+G\* - scaled factor 0.986 - SCRF(PCM,solvent=acetone) -  $\epsilon=20.7$ )

0 1

|    |           |           |           |
|----|-----------|-----------|-----------|
| C  | -0.054036 | -0.856477 | 0.509020  |
| C  | -0.014606 | -0.568209 | 1.880433  |
| C  | 1.221712  | -0.462168 | 2.539517  |
| C  | 2.418764  | -0.646510 | 1.828687  |
| C  | 2.383728  | -0.937039 | 0.458052  |
| C  | 1.146329  | -1.036029 | -0.179333 |
| O  | -1.109434 | -0.357940 | 2.658344  |
| C  | -2.403038 | -0.442424 | 2.069053  |
| C  | 1.252501  | -0.174153 | 4.003326  |
| O  | 1.048796  | -0.934920 | 4.895188  |
| O  | 3.554244  | -0.535851 | 2.568263  |
| C  | 4.816783  | -0.667326 | 1.922459  |
| Cl | 1.624863  | 1.575247  | 4.374062  |
| H  | 3.297304  | -1.087336 | -0.104128 |
| H  | 1.116560  | -1.261051 | -1.242165 |
| H  | -0.997551 | -0.938328 | -0.016754 |
| H  | -3.105499 | -0.242121 | 2.879091  |
| H  | -2.527967 | 0.309087  | 1.279566  |
| H  | -2.587290 | -1.444621 | 1.662663  |
| H  | 5.561257  | -0.517936 | 2.705520  |
| H  | 4.936365  | -1.667639 | 1.488037  |
| H  | 4.943356  | 0.095086  | 1.143918  |

## Cartesians coordinates

1g<sup>-</sup>

22

ZPE: -1034.099715 a.u., thermal energy: -1034.086248 a.u. (B3LYP/6-31+G\* - scaled factor 0.986)

ZPE: -1034.161368 a.u., thermal energy: -1034.147810 a.u. (B3LYP/6-31+G\* - scaled factor 0.986 - SCRF(PCM,solvent=chloroform) -  $\epsilon=4.7$ )

ZPE: -1034.171471 a.u., thermal energy: -1034.157980 a.u. (B3LYP/6-31+G\* - scaled factor 0.986 - SCRF(PCM,solvent=o-dichlorobenzene) -  $\epsilon=9.9$ )

ZPE: -1034.177586 a.u., thermal energy: -1034.163749 a.u. (B3LYP/6-31+G\* - scaled factor 0.986 - SCRF(PCM,solvent=acetone) -  $\epsilon=20.7$ )

-1 2

|    |           |           |           |
|----|-----------|-----------|-----------|
| C  | -0.017637 | 0.046227  | 0.009216  |
| C  | 0.003901  | -0.003198 | 1.468336  |
| C  | 1.183355  | 0.009679  | 2.192177  |
| C  | 2.440087  | 0.008574  | 1.554870  |
| C  | 2.461909  | -0.097245 | 0.152862  |
| C  | 1.296451  | -0.110734 | -0.596659 |
| O  | -1.169377 | 0.056955  | 2.207315  |
| C  | -1.890820 | -1.167925 | 2.299353  |
| O  | 1.465053  | -0.309319 | -1.960085 |
| C  | 0.948725  | -1.536546 | -2.458029 |
| C  | -1.252191 | 0.305610  | -0.646468 |
| O  | -2.416858 | 0.150166  | -0.306567 |
| Cl | -1.100663 | 1.080195  | -2.450782 |
| H  | 1.102422  | 0.035335  | 3.276963  |
| H  | 3.361648  | 0.037085  | 2.130474  |
| H  | 3.400497  | -0.204139 | -0.387508 |
| H  | 1.126207  | -1.530108 | -3.537821 |
| H  | 1.474177  | -2.391344 | -2.001006 |

|   |           |           |           |
|---|-----------|-----------|-----------|
| H | -0.127858 | -1.630517 | -2.275283 |
| H | -2.772119 | -0.959430 | 2.915370  |
| H | -2.218692 | -1.510257 | 1.312605  |
| H | -1.276540 | -1.941187 | 2.788914  |

**Cartesians coordinates****1e**

22

ZPE: -1034.084160 a.u., thermal energy: -1034.071254 a.u. (B3LYP/6-31+G\* - scaled factor 0.986)

0 1

|    |           |           |           |
|----|-----------|-----------|-----------|
| C  | 0.003369  | -0.035099 | 0.025682  |
| C  | 0.004950  | -0.022599 | 1.410805  |
| C  | 1.241868  | -0.025511 | 2.109287  |
| C  | 2.441233  | -0.021218 | 1.383977  |
| C  | 2.426728  | -0.029420 | -0.009892 |
| C  | 1.211348  | -0.040491 | -0.704227 |
| O  | -1.188448 | -0.095954 | 2.081043  |
| C  | -1.593170 | 1.084809  | 2.788629  |
| O  | 1.162701  | -0.043040 | 3.461390  |
| C  | 2.367385  | -0.102762 | 4.223540  |
| C  | 1.094508  | -0.052975 | -2.173785 |
| O  | 0.080846  | -0.053901 | -2.809995 |
| Cl | 2.687843  | -0.066923 | -3.089790 |
| H  | -0.947769 | -0.051193 | -0.496057 |
| H  | 3.394405  | -0.021295 | 1.900604  |
| H  | 3.365315  | -0.030748 | -0.551304 |
| H  | 2.050661  | -0.135315 | 5.267006  |
| H  | 2.939563  | -1.007490 | 3.984574  |
| H  | 2.987116  | 0.786521  | 4.053800  |
| H  | -2.563063 | 0.847642  | 3.230946  |
| H  | -0.878594 | 1.339116  | 3.578100  |
| H  | -1.702488 | 1.927833  | 2.093677  |

**Cartesians coordinates****1e<sup>-</sup>**

22

ZPE: -1034.114465 a.u., thermal energy: -1034.100806 a.u. (B3LYP/6-31+G\* - scaled factor 0.986)

-1 2

|    |           |           |           |
|----|-----------|-----------|-----------|
| C  | -0.039872 | -0.000683 | 0.002696  |
| C  | 0.003867  | -0.024571 | 1.447008  |
| C  | 1.199054  | -0.034845 | 2.135103  |
| C  | 2.439794  | -0.021387 | 1.449416  |
| C  | 2.420292  | 0.013004  | 0.041963  |
| C  | 1.225880  | 0.022794  | -0.667876 |
| O  | 1.173054  | -0.107973 | 3.528054  |
| C  | 1.521795  | 1.104939  | 4.182655  |
| O  | 3.593555  | -0.045302 | 2.233794  |
| C  | 4.827988  | -0.129915 | 1.563023  |
| C  | -1.317621 | 0.000967  | -0.600918 |
| Cl | -1.244563 | 0.049649  | -2.581788 |
| O  | -2.452059 | -0.008855 | -0.139666 |
| H  | -0.924969 | -0.046304 | 2.007652  |
| H  | 3.351518  | 0.027623  | -0.517817 |
| H  | 1.248999  | 0.046279  | -1.750835 |
| H  | 5.596653  | -0.177545 | 2.340798  |
| H  | 4.891561  | -1.033307 | 0.936395  |

|   |          |          |          |
|---|----------|----------|----------|
| H | 5.014309 | 0.750770 | 0.927772 |
| H | 1.421331 | 0.918459 | 5.257611 |
| H | 2.555530 | 1.399315 | 3.959354 |
| H | 0.839030 | 1.917058 | 3.890303 |

**Cartesians coordinates****1b**

18

ZPE: -919.592316 a.u., thermal energy: -919.582938 a.u. (B3LYP/6-31+G\* - scaled factor 0.986)

0 1

|    |           |           |           |
|----|-----------|-----------|-----------|
| C  | -0.000232 | 0.001426  | -0.006103 |
| C  | 0.007701  | 0.000708  | 1.400712  |
| C  | 1.208012  | 0.000077  | 2.092429  |
| C  | 2.433120  | 0.000157  | 1.397732  |
| C  | 2.415400  | 0.000847  | -0.008190 |
| C  | 1.215240  | 0.001484  | -0.711895 |
| C  | 3.756979  | -0.000472 | 2.046033  |
| O  | 4.821051  | -0.001050 | 1.494940  |
| O  | -1.224831 | 0.001958  | -0.587444 |
| C  | -1.318353 | 0.003398  | -2.010875 |
| Cl | 3.735111  | -0.002200 | 3.878798  |
| H  | 1.234327  | 0.001977  | -1.796088 |
| H  | -0.942464 | 0.000668  | 1.926421  |
| H  | 3.358329  | 0.000881  | -0.546550 |
| H  | 1.200403  | -0.000457 | 3.176521  |
| H  | -2.387026 | 0.004202  | -2.232784 |
| H  | -0.853434 | 0.901811  | -2.436362 |
| H  | -0.854434 | -0.894708 | -2.438110 |

**Cartesians coordinates****1b<sup>-</sup>**

18

ZPE: -919.626095 a.u., thermal energy: -919.615265 a.u. (B3LYP/6-31+G\* - scaled factor 0.986)

-1 2

|    |           |           |           |           |
|----|-----------|-----------|-----------|-----------|
| C  | 0.000000  | 0.000000  | 0.000000  | 0.568164  |
| C  | 0.000000  | 0.000000  | 1.404644  | -0.031780 |
| C  | 1.234914  | 0.000000  | 2.089929  | -0.818614 |
| C  | 2.433962  | 0.000000  | 1.403589  | -0.928478 |
| C  | 2.476216  | 0.000000  | -0.032758 | 1.110651  |
| C  | 1.199915  | 0.000000  | -0.705447 | -0.438817 |
| O  | -1.145076 | -0.000044 | 2.207686  | -0.399954 |
| C  | -2.391389 | 0.000347  | 1.555853  | -0.308688 |
| C  | 3.634922  | 0.000000  | -0.840482 | -0.285033 |
| Cl | 5.324805  | -0.000032 | 0.207862  | -0.216969 |
| O  | 3.799607  | -0.000016 | -2.054366 | -0.460583 |
| H  | -0.931978 | -0.000016 | -0.559701 | 0.140951  |
| H  | 1.224695  | 0.000000  | 3.178154  | 0.154767  |
| H  | 1.188679  | 0.000000  | -1.791037 | 0.179043  |
| H  | 3.367504  | 0.000016  | 1.954365  | 0.187651  |
| H  | -3.151883 | 0.000428  | 2.343230  | 0.175415  |
| H  | -2.525802 | 0.894380  | 0.925707  | 0.186174  |
| H  | -2.526263 | -0.893455 | 0.925477  | 0.186156  |

**Cartesians coordinates****1f**

26

ZPE: -1148.569662 a.u., thermal energy: -1148.553858 a.u. (B3LYP/6-31+G\* - scaled factor 0.986)

0 1

|    |           |           |           |
|----|-----------|-----------|-----------|
| C  | 0.000771  | -0.000110 | -0.000580 |
| C  | 0.000454  | -0.000286 | 1.399338  |
| C  | 1.205676  | -0.000410 | 2.100822  |
| C  | 2.431894  | -0.005694 | 1.406514  |
| C  | 2.438656  | -0.024111 | 0.016404  |
| C  | 1.217836  | -0.011052 | -0.709833 |
| C  | 1.296785  | 0.009333  | 3.577369  |
| Cl | -0.296087 | -0.003885 | 4.469786  |
| O  | 3.572333  | -0.093478 | -0.739643 |
| C  | 4.828787  | -0.188349 | -0.072449 |
| O  | 1.183082  | -0.130762 | -2.068593 |
| C  | 1.837095  | 0.870420  | -2.866763 |
| O  | -1.227584 | -0.059883 | -0.592356 |
| C  | -1.512516 | 0.732122  | -1.751779 |
| O  | 2.307017  | 0.023437  | 4.221277  |
| H  | 3.351390  | -0.017534 | 1.976837  |
| H  | -0.954400 | 0.005446  | 1.909267  |
| H  | -1.059214 | 1.727375  | -1.664538 |
| H  | -1.163508 | 0.242523  | -2.663322 |
| H  | -2.600251 | 0.831786  | -1.772846 |
| H  | 5.575507  | -0.261879 | -0.864509 |
| H  | 5.023728  | 0.703648  | 0.535623  |
| H  | 4.872705  | -1.083917 | 0.559126  |
| H  | 1.558302  | 0.645830  | -3.898283 |
| H  | 1.473271  | 1.869984  | -2.596528 |
| H  | 2.921341  | 0.824196  | -2.750984 |

**Cartesians coordinates****1f<sup>-</sup>**

26

ZPE: -1148.604928 a.u., thermal energy: -1148.588566 a.u. (B3LYP/6-31+G\* - scaled factor 0.986)

-1 2

|    |           |           |           |
|----|-----------|-----------|-----------|
| C  | 0.001489  | -0.001302 | -0.004391 |
| C  | -0.000499 | 0.000006  | 1.378666  |
| C  | 1.228424  | 0.000659  | 2.111306  |
| C  | 2.451170  | -0.032205 | 1.344215  |
| C  | 2.425241  | -0.047331 | -0.038239 |
| C  | 1.200897  | 0.001522  | -0.758412 |
| C  | 1.369952  | 0.022923  | 3.518601  |
| Cl | -0.334385 | 0.072447  | 4.481270  |
| O  | 3.564795  | -0.118103 | -0.825787 |
| C  | 4.812307  | -0.218148 | -0.168546 |
| O  | 1.151230  | -0.106965 | -2.142704 |
| C  | 1.692771  | 0.991379  | -2.870164 |
| O  | -1.226335 | -0.075488 | -0.659786 |
| C  | -1.663609 | 1.135219  | -1.255118 |
| O  | 2.364222  | 0.019574  | 4.237307  |
| H  | 3.383806  | -0.050869 | 1.893490  |
| H  | -0.950449 | -0.011528 | 1.898410  |
| H  | -1.702438 | 1.947138  | -0.513119 |
| H  | -1.015869 | 1.437376  | -2.088661 |

|   |           |           |           |
|---|-----------|-----------|-----------|
| H | -2.672756 | 0.947491  | -1.637964 |
| H | 5.564138  | -0.290224 | -0.960090 |
| H | 5.016425  | 0.666980  | 0.451009  |
| H | 4.861951  | -1.113015 | 0.467421  |
| H | 1.473423  | 0.799231  | -3.926940 |
| H | 1.220889  | 1.939024  | -2.567038 |
| H | 2.776347  | 1.070318  | -2.727881 |

**Cartesians coordinates****1d-**

22

ZPE: -1034.134281 a.u., thermal energy: -1034.120565 a.u. (B3LYP/6-31+G\*\* - scaled factor 0.986)

-1 2

|    |           |           |           |
|----|-----------|-----------|-----------|
| C  | 0.001010  | 0.000048  | 0.000101  |
| C  | 0.001037  | 0.000021  | 1.414961  |
| C  | 1.264706  | 0.000079  | 2.051714  |
| C  | 2.455003  | 0.000158  | 1.349982  |
| C  | 2.448367  | 0.000197  | -0.082596 |
| C  | 1.166598  | 0.000133  | -0.739582 |
| O  | 1.388783  | 0.000059  | 3.439838  |
| C  | 0.216238  | -0.000019 | 4.221220  |
| C  | 3.591238  | 0.000194  | -0.919156 |
| Cl | 5.293326  | -0.000111 | 0.070867  |
| O  | -1.180914 | 0.000009  | -0.737941 |
| C  | -2.408070 | -0.000059 | -0.044671 |
| O  | 3.714965  | 0.000046  | -2.137953 |
| H  | 1.117067  | 0.000154  | -1.821761 |
| H  | 3.389720  | 0.000194  | 1.894333  |
| H  | -3.189461 | -0.000080 | -0.809865 |
| H  | -2.526840 | -0.893752 | 0.585821  |
| H  | -2.526923 | 0.893602  | 0.585852  |
| H  | -0.917917 | -0.000041 | 1.981037  |
| H  | 0.545789  | -0.000021 | 5.264061  |
| H  | -0.400223 | 0.893630  | 4.042610  |
| H  | -0.400126 | -0.893728 | 4.042575  |

**TS-**

22

ZPE: -1034.120998 a.u., thermal energy: -1034.107643 a.u. (B3LYP/6-31+G\*\* - scaled factor 0.986)

-1 2

|    |           |           |           |
|----|-----------|-----------|-----------|
| C  | 0.000843  | -0.002129 | -0.000711 |
| C  | 0.000139  | -0.005177 | 1.406485  |
| C  | 1.219285  | -0.005329 | 2.078273  |
| C  | 2.430160  | -0.023157 | 1.367582  |
| C  | 2.396813  | -0.032401 | -0.037892 |
| C  | 1.187555  | -0.002331 | -0.738868 |
| O  | 1.151280  | 0.005489  | 3.457739  |
| C  | 2.357525  | -0.038739 | 4.195714  |
| O  | 3.532631  | -0.055173 | -0.807200 |
| C  | 4.792710  | -0.101880 | -0.171041 |
| C  | -1.304009 | 0.105307  | -0.704495 |
| Cl | 0.111475  | -0.455773 | -3.953694 |
| O  | -2.372442 | -0.294678 | -0.342576 |
| H  | -0.929508 | -0.007539 | 1.964778  |
| H  | 1.143577  | -0.021736 | -1.833007 |
| H  | 2.066173  | -0.038662 | 5.248287  |
| H  | 2.932864  | -0.950163 | 3.981477  |

|   |          |           |           |
|---|----------|-----------|-----------|
| H | 2.989031 | 0.838743  | 3.998001  |
| H | 3.373867 | -0.025414 | 1.894795  |
| H | 5.531539 | -0.130525 | -0.974322 |
| H | 4.971791 | 0.788131  | 0.449904  |
| H | 4.903085 | -1.001670 | 0.451299  |

**Cartesians coordinates****1c**

16

ZPE: -1009.609391 a.u., thermal energy: -1009.599330 a.u.(B3LYP/6-31+G\*\* - scaled factor 0.986)

0 1

|    |           |           |           |
|----|-----------|-----------|-----------|
| C  | -0.000015 | -0.000037 | 0.000103  |
| C  | -0.000318 | -0.000015 | 1.393320  |
| C  | 1.213166  | -0.000005 | 2.096604  |
| C  | 2.433232  | -0.000016 | 1.396101  |
| C  | 2.443366  | -0.000037 | 0.005544  |
| C  | 1.222175  | -0.000048 | -0.668615 |
| C  | 1.303656  | 0.000017  | 3.585492  |
| Cl | -0.277701 | 0.000052  | 4.470369  |
| N  | 1.224746  | -0.000070 | -2.148728 |
| O  | 0.134983  | -0.000069 | -2.719546 |
| O  | 2.321598  | 0.000040  | 4.212643  |
| O  | 2.316771  | -0.000050 | -2.715116 |
| H  | 3.363174  | -0.000007 | 1.953017  |
| H  | 3.369552  | -0.000045 | -0.555342 |
| H  | -0.923561 | -0.000045 | -0.564948 |
| H  | -0.940941 | -0.000006 | 1.929409  |

**Cartesians coordinates****1c'**

16

ZPE: -1009.697050 a.u., thermal energy: -1009.686848 a.u.(B3LYP/6-31+G\*\* - scaled factor 0.986)

-1 2

|    |           |           |           |           |
|----|-----------|-----------|-----------|-----------|
| C  | 0.000000  | 0.000000  | 0.000000  | -0.021197 |
| C  | 0.000000  | 0.000000  | 1.378673  | -1.305567 |
| C  | 1.218401  | 0.000000  | 2.117930  | 1.331601  |
| C  | 2.443364  | 0.000000  | 1.376825  | 0.181773  |
| C  | 2.450283  | 0.000000  | 0.000296  | 0.217280  |
| C  | 1.224797  | 0.000000  | -0.717428 | -0.571458 |
| C  | 1.324654  | 0.000000  | 3.547742  | -0.224752 |
| Cl | -0.350299 | -0.000182 | 4.467794  | -0.061309 |
| N  | 1.226022  | 0.000000  | -2.121333 | -0.413722 |
| O  | 0.116343  | -0.000078 | -2.736514 | -0.150803 |
| O  | 2.304268  | -0.000129 | 4.257203  | -0.384611 |
| O  | 2.337226  | -0.000078 | -2.734346 | -0.153255 |
| H  | 3.379690  | 0.000000  | 1.926450  | 0.132597  |
| H  | 3.378934  | 0.000000  | -0.558090 | 0.145128  |
| H  | -0.927845 | 0.000000  | -0.559425 | 0.144696  |
| H  | -0.942910 | 0.000000  | 1.913232  | 0.133410  |



**Cartesians coordinates****1g<sup>-</sup>**

22

ZPE: -1034.110681 a.u., thermal energy: -1034.097423 a.u. (B3LYP/6-31+G\*\* - scaled factor 0.986)

-1 2

|    |           |           |           |
|----|-----------|-----------|-----------|
| C  | 0.003120  | -0.001554 | -0.001394 |
| C  | 0.001697  | -0.000659 | 1.453919  |
| C  | 1.340281  | 0.001112  | 2.037227  |
| C  | 2.479148  | 0.196475  | 1.276065  |
| C  | 2.414955  | 0.342063  | -0.123969 |
| C  | 1.159599  | 0.192358  | -0.739347 |
| C  | -1.121371 | 0.069534  | 2.322852  |
| Cl | -2.762905 | 0.802573  | 1.519934  |
| O  | 1.526212  | -0.072863 | 3.410593  |
| C  | 1.414876  | -1.380619 | 3.966844  |
| O  | -1.148768 | -0.220115 | -0.744260 |
| C  | -1.716003 | -1.517863 | -0.610999 |
| O  | -1.275897 | -0.230874 | 3.498490  |
| H  | 3.427485  | 0.247303  | 1.805086  |
| H  | 3.311546  | 0.512888  | -0.712063 |
| H  | 1.060468  | 0.192094  | -1.822107 |
| H  | -2.621483 | -1.523947 | -1.223965 |
| H  | -1.016708 | -2.286263 | -0.977411 |
| H  | -1.990079 | -1.739474 | 0.425945  |
| H  | 1.603208  | -1.276102 | 5.039920  |
| H  | 0.410189  | -1.788996 | 3.821387  |
| H  | 2.169428  | -2.052204 | 3.527908  |

**Cartesians coordinates****1d<sup>-</sup>**

22

ZPE: -1034.134380 a.u., thermal energy: -1034.120710 a.u. (B3LYP/6-31++G\*\* - scaled factor 0.986)

-1 2

|    |           |           |           |           |
|----|-----------|-----------|-----------|-----------|
| C  | 0.000000  | 0.000000  | 0.000000  | -0.011406 |
| C  | 0.000000  | 0.000000  | 1.414815  | 0.881602  |
| C  | 1.263287  | 0.000000  | 2.052311  | -0.443943 |
| C  | 2.453690  | 0.000000  | 1.350438  | -1.476352 |
| C  | 2.447889  | 0.000000  | -0.082251 | 1.651026  |
| C  | 1.166135  | 0.000000  | -0.739174 | -0.543002 |
| O  | 1.388573  | 0.000000  | 3.440513  | -0.353140 |
| C  | 0.218241  | 0.000000  | 4.223627  | -0.199646 |
| C  | 3.590970  | 0.000040  | -0.918921 | -0.434526 |
| Cl | 5.293332  | 0.000446  | 0.070685  | -0.188933 |
| O  | -1.181841 | 0.000000  | -0.738669 | -0.354357 |
| C  | -2.409060 | 0.000000  | -0.047025 | -0.191941 |
| O  | 3.714944  | 0.000219  | -2.137735 | -0.448316 |
| H  | 1.116617  | 0.000000  | -1.822135 | 0.128626  |
| H  | 3.388499  | 0.000000  | 1.896128  | 0.105933  |
| H  | -3.188972 | 0.000000  | -0.814835 | 0.128085  |
| H  | -2.527379 | -0.894782 | 0.583192  | 0.145444  |
| H  | -2.527386 | 0.894791  | 0.583179  | 0.145440  |
| H  | -0.920165 | 0.000000  | 1.980595  | 0.041207  |
| H  | 0.551770  | 0.000000  | 5.266009  | 0.127872  |
| H  | -0.397884 | 0.894807  | 4.045351  | 0.145153  |
| H  | -0.397884 | -0.894807 | 4.045351  | 0.145157  |

**Cartesians Cordinates****TS<sup>-</sup>**

22

ZPE: -1034.121231 a.u., thermal energy: -1034.107872 a.u.(B3LYP/6-31++G\*\* - scaled factor 0.986)

-1 2

|    |           |           |           |
|----|-----------|-----------|-----------|
| C  | 0.000000  | 0.000000  | 0.000000  |
| C  | 0.000000  | 0.000000  | 1.397515  |
| C  | 1.194553  | 0.000000  | 2.141290  |
| C  | 2.408911  | 0.003448  | 1.460914  |
| C  | 2.445046  | -0.013731 | 0.057331  |
| C  | 1.233993  | -0.025876 | -0.656616 |
| C  | -1.287172 | 0.103173  | 2.133837  |
| O  | -1.542274 | -0.297177 | 3.232566  |
| O  | 3.544221  | 0.017012  | 2.247397  |
| C  | 4.808156  | -0.023334 | 1.613216  |
| O  | 1.180510  | -0.048276 | -2.027434 |
| C  | 2.385963  | -0.096228 | -2.761588 |
| Cl | -3.297023 | -0.456620 | -0.781610 |
| H  | 1.177466  | -0.002823 | 3.225519  |
| H  | -0.952374 | -0.022078 | -0.540355 |
| H  | 5.547763  | -0.021260 | 2.416850  |
| H  | 4.933199  | -0.934193 | 1.011275  |
| H  | 4.971601  | 0.854777  | 0.972829  |
| H  | 3.391149  | -0.012810 | -0.465581 |
| H  | 2.093627  | -0.126392 | -3.813089 |
| H  | 3.008164  | 0.793938  | -2.587549 |
| H  | 2.972746  | -0.995727 | -2.525568 |

**Cartesians coordinates****1c**

16

ZPE: -1009.609495 a.u., thermal energy: -1009.599434 a.u.(B3LYP/6-31++G\*\* - scaled factor 0.986)

0 1

|    |           |           |           |           |
|----|-----------|-----------|-----------|-----------|
| C  | 0.000000  | 0.000000  | 0.000000  | -0.331187 |
| C  | 0.000000  | 0.000000  | 1.393531  | -0.987044 |
| C  | 1.213358  | 0.000000  | 2.096947  | 1.201750  |
| C  | 2.433292  | 0.000000  | 1.395935  | 0.648189  |
| C  | 2.443220  | 0.000000  | 0.005207  | -0.113316 |
| C  | 1.221992  | 0.000000  | -0.669475 | -0.582177 |
| C  | 1.303287  | 0.000000  | 3.586044  | -0.123294 |
| Cl | -0.278069 | 0.000000  | 4.471102  | 0.137744  |
| N  | 1.224860  | 0.000000  | -2.149584 | -0.235678 |
| O  | 0.135269  | -0.000171 | -2.720614 | -0.019239 |
| O  | 2.320990  | 0.000000  | 4.213437  | -0.270723 |
| O  | 2.317021  | -0.000171 | -2.715659 | -0.023260 |
| H  | 3.364614  | 0.000000  | 1.951775  | 0.175704  |
| H  | 3.370902  | 0.000000  | -0.554340 | 0.200762  |
| H  | -0.925358 | 0.000000  | -0.563246 | 0.202054  |
| H  | -0.941499 | 0.000000  | 1.929247  | 0.119833  |

**Cartesians coordinates****1c<sup>-</sup>**

16

ZPE: -1009.6697134 a.u., thermal energy: -1009.686935 a.u.(B3LYP/6-31++G\*\* - scaled factor 0.986)

```

-1 2
C   -0.000112   -0.000072   0.000263
C   -0.000220    0.000002   1.378642
C    1.218585    0.000045   2.117621
C    2.443808   -0.000010   1.376869
C    2.450621   -0.000084   0.000616
C    1.224927   -0.000124  -0.716311
C    1.324718    0.000111   3.547222
Cl   -0.350613   -0.000216   4.466814
N    1.225820   -0.000188  -2.120470
O    0.116129    0.000162  -2.735214
O    2.304338   -0.000070   4.257038
O    2.336704    0.000150  -2.733633
H    3.378763    0.000013   1.927265
H    3.377183   -0.000118  -0.559944
H   -0.925752   -0.000099  -0.561472
H   -0.941972    0.000032   1.913702

```

### Cartesians coordinates

**1g<sup>-</sup>**

22

ZPE: -1034.110971 a.u., thermal energy: -1034.097717 a.u. (B3LYP/6-31++G\*\* - scaled factor 0.986)

```

-1 2
C    0.002920   -0.001215  -0.001243
C    0.001559    0.000350   1.453956
C    1.339934    0.001380   2.037390
C    2.478937    0.196528   1.276176
C    2.414750    0.341442  -0.123815
C    1.159463    0.192276  -0.739311
C   -1.121687    0.070503   2.322863
Cl   -2.763195    0.802832   1.519731
O    1.525840   -0.072768   3.410625
C    1.414907   -1.380812   3.966447
O   -1.149081   -0.219806  -0.743696
C   -1.715499   -1.517945  -0.610670
O   -1.276177   -0.230741   3.498186
H    3.427317    0.247204   1.805087
H    3.311408    0.511802  -0.711940
H    1.060357    0.192047  -1.822065
H   -2.621058   -1.524293  -1.223507
H   -1.015587   -2.285711  -0.977260
H   -1.989279   -1.740205   0.426258
H    1.603445   -1.276627   5.039534
H    0.410267   -1.789314   3.820883
H    2.169460   -2.052062   3.527024

```

## Spin density distribution (orange) and value on C(O)-Cl

| Phase           | Basis set                              | 1c <sup>-</sup>                                                                            | 1d <sup>-</sup>                                                                              | 1g <sup>-</sup>                                                                              | 1a <sup>-</sup>                                                                             | 1b <sup>-</sup>                                                                              | 1e <sup>-</sup>                                                                              | 1f <sup>-</sup>                                                                              |
|-----------------|----------------------------------------|--------------------------------------------------------------------------------------------|----------------------------------------------------------------------------------------------|----------------------------------------------------------------------------------------------|---------------------------------------------------------------------------------------------|----------------------------------------------------------------------------------------------|----------------------------------------------------------------------------------------------|----------------------------------------------------------------------------------------------|
| Gas             | 6-31+G <sup>+</sup>                    | 0.103<br>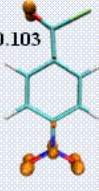 | 0.284<br>   | 0.255<br>   | 0.266<br> | 0.296<br> | 0.281<br> | 0.262<br> |
|                 | 6-31+G <sup>++</sup>                   | 0.102<br> | 0.262<br>   | 0.255<br>   |                                                                                             |                                                                                              |                                                                                              |                                                                                              |
|                 | 6-31++G <sup>++</sup>                  | 0.095<br> | 0.266<br>   | 0.250<br>   |                                                                                             |                                                                                              |                                                                                              |                                                                                              |
| Condensed (PCM) | 6-31+G <sup>+</sup><br>$\epsilon=4.7$  |                                                                                            | 0.347<br>  | 0.303<br>  |                                                                                             |                                                                                              |                                                                                              |                                                                                              |
|                 | 6-31+G <sup>+</sup><br>$\epsilon=9.9$  |                                                                                            | 0.360<br> | 0.315<br> |                                                                                             |                                                                                              |                                                                                              |                                                                                              |
|                 | 6-31+G <sup>+</sup><br>$\epsilon=20.7$ |                                                                                            | 0.367<br> | 0.336<br> |                                                                                             |                                                                                              |                                                                                              |                                                                                              |

1g<sup>-</sup> Geometry

| Phase           | Basis set                              | Dihedral angle Cl-C(O)-C <sup>1</sup> -C <sup>2</sup> |                                                                                       |
|-----------------|----------------------------------------|-------------------------------------------------------|---------------------------------------------------------------------------------------|
| Gas             | 6-31+G <sup>*</sup>                    | -20.5°                                                | 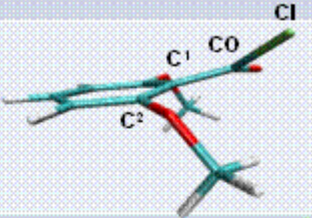   |
|                 | 6-31+G <sup>**</sup>                   | -20.7°                                                |    |
|                 | 6-31++G <sup>**</sup>                  | -20.8°                                                |   |
| Condensed (PCM) | 6-31+G <sup>*</sup><br>$\epsilon=4.7$  | -23.2°                                                |  |
|                 | 6-31+G <sup>*</sup><br>$\epsilon=9.9$  | -23.8°                                                |  |
|                 | 6-31+G <sup>*</sup><br>$\epsilon=20.7$ | -24.5°                                                |  |

$^1\text{H}$  and  $^{13}\text{C}$  NMR of **3dd**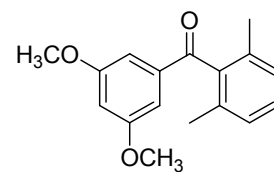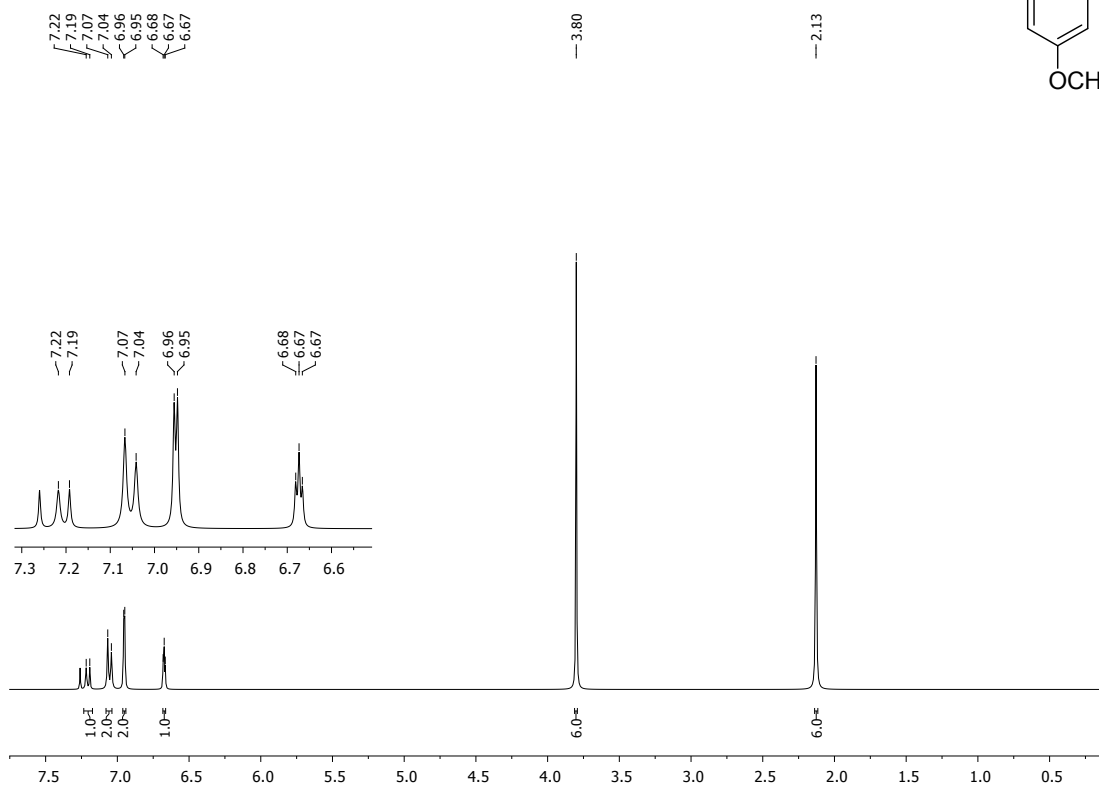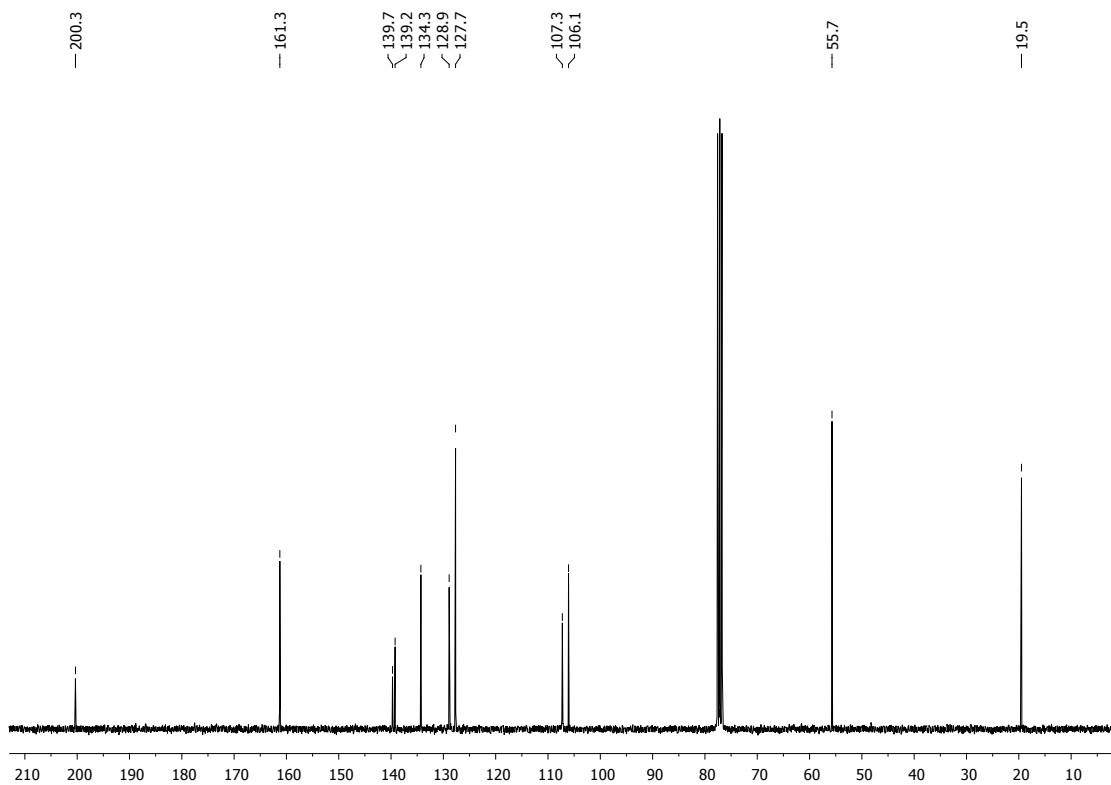

$^1\text{H}$  and  $^{13}\text{C}$  NMR of **3ed**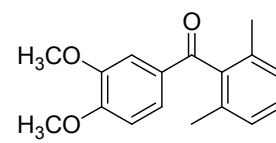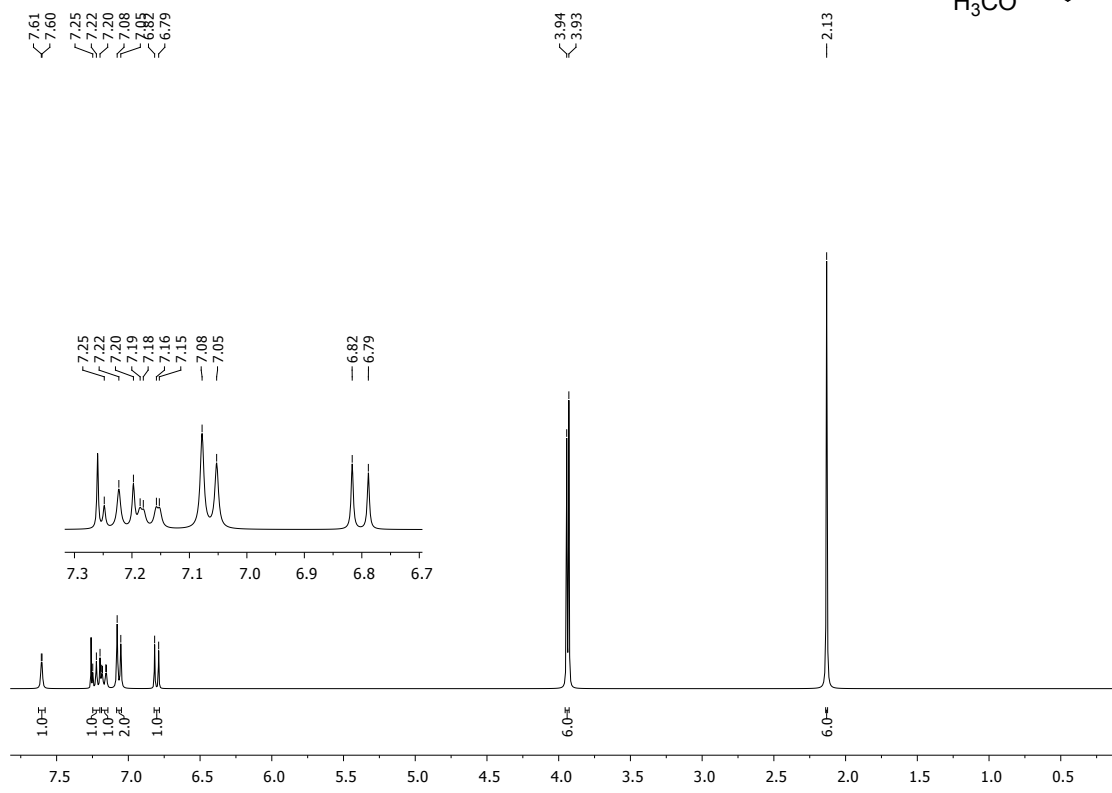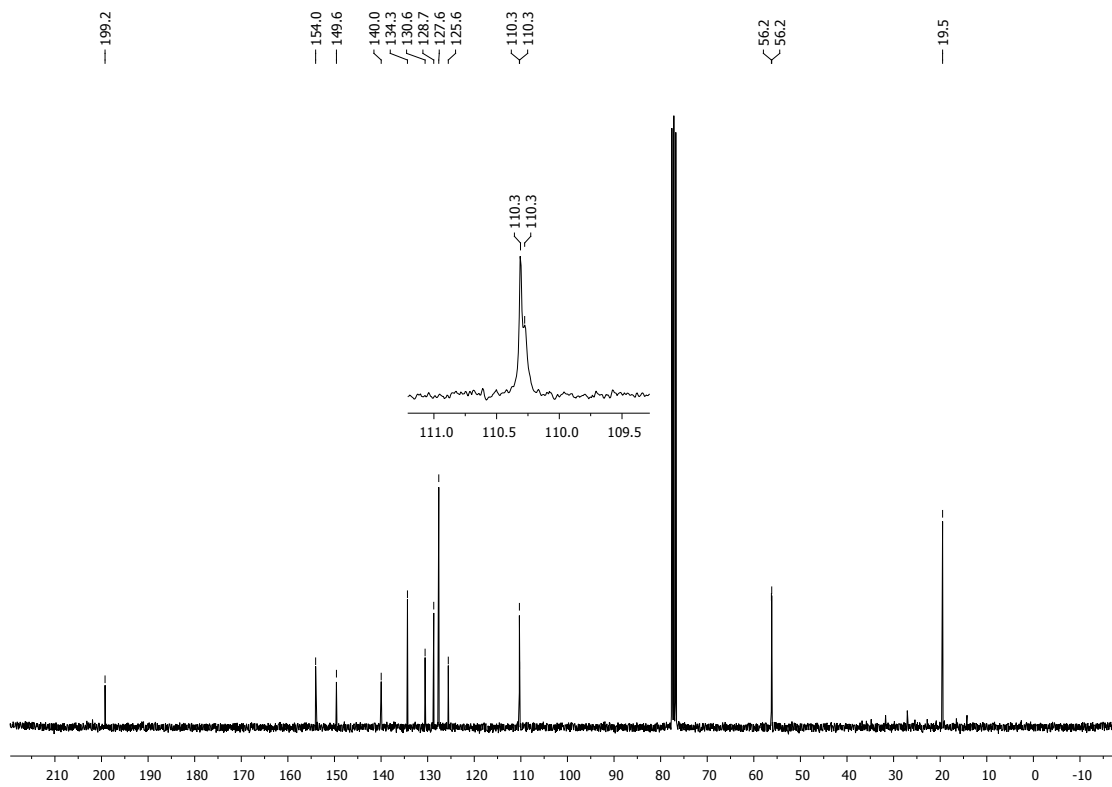

$^1\text{H}$  and  $^{13}\text{C}$  NMR of **3fd**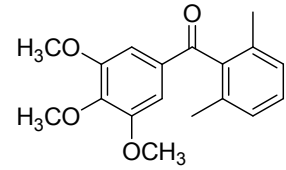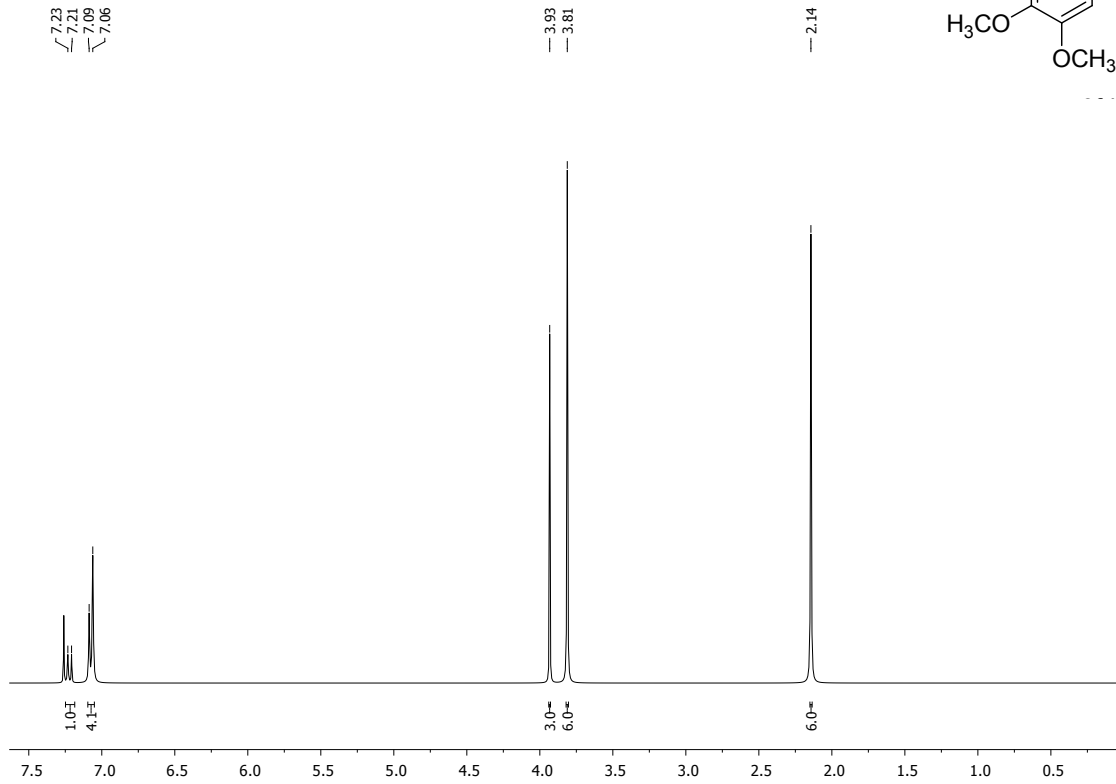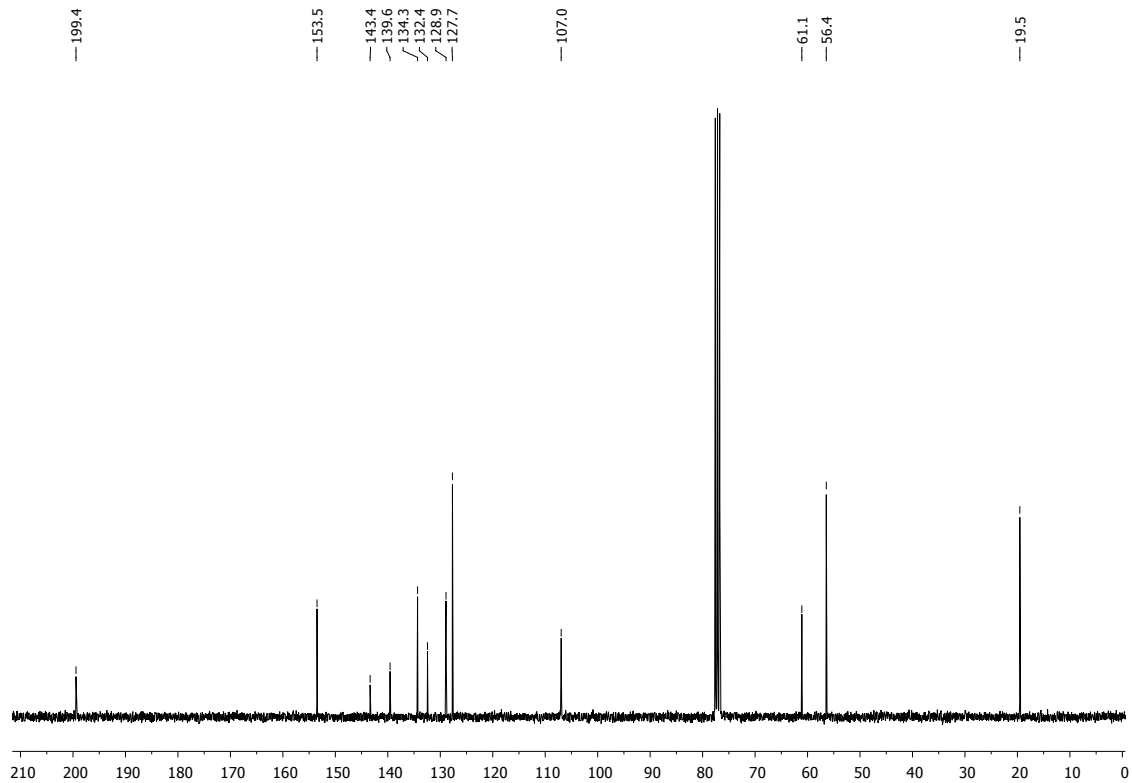

Supplement: c4ra07305c1.pdf [file c4ra07305c1.pdf]
